# Supplementary material for: Acceleration effect of reduced graphene oxide on photoinduced synthesis of silver nanoparticles
Source: Royal Society of Chemistry journal article supplement (doi:10.1039/c3cp44312d), 2013-01-01
Supplement: c3cp44312d.pdf [file c3cp44312d.pdf]

## Supplementary Information

# Acceleration effect of reduced graphene oxide on photoinduced synthesis of silver nanoparticles

Bin Tang,<sup>a</sup> Xueliang Hou,<sup>a</sup> Jingliang Li,<sup>a</sup> Mingwen Zhang,<sup>a</sup> Lu Sun,<sup>\*ab</sup> and Xungai Wang<sup>\*ab</sup>

<sup>a</sup> Institute for Frontier Materials, Deakin University, Geelong, Victoria 3216, Australia. E-mails: xungai.wang@deakin.edu.au (X.W.), lu.sun@deakin.edu.au (L.S.). Tel: +61 3 5227 3247. Fax: +61 3 5227 2539.

<sup>b</sup> School of Textile Science & Engineering, Wuhan Textile University, Wuhan 430073, China

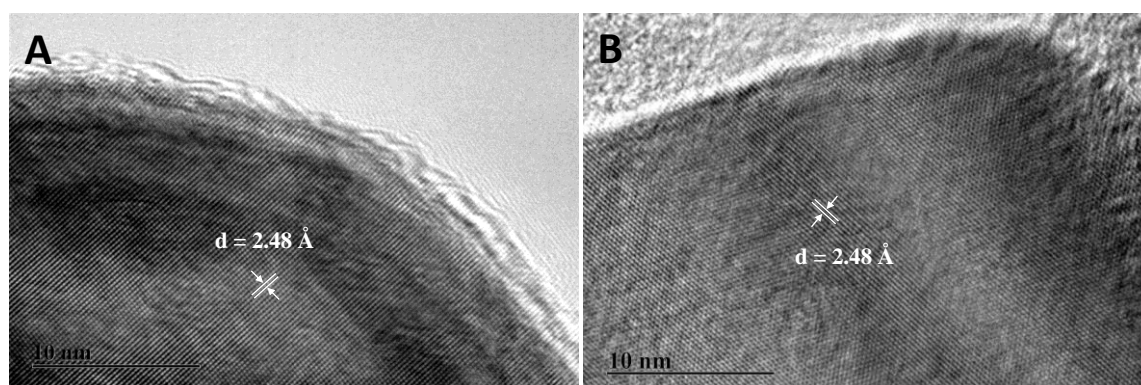

**Fig. S1** HRTEM images of silver nanoprisms (A) without and (B) with RGO by directing the electron beam perpendicular to the flat face.

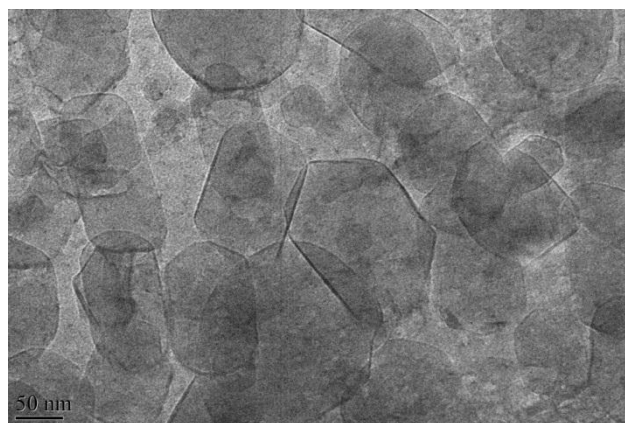

**Fig. S2** TEM image of RGO nanosheets after photoinduction.
